# Supplementary material for: Antimicrobial Resistance and Environmental Health: A Water Stewardship Framework for Global and National Action
Source: MDPI journal article supplement (doi:10.3390/antibiotics11010063), 2022-01-05
Supplement: s1 [file s1]

| Country               | WHO Region: World Bank Country Income Classification | NAP Timeframe | NAP Version | Water Type Included | AMR One Health Sector |              |             | Pillars           |                 |              |                     | Themes                                 |                            |                           |                             |                                     |                                  |                                                                                                                                                               |  |  |  |
|-----------------------|------------------------------------------------------|---------------|-------------|---------------------|-----------------------|--------------|-------------|-------------------|-----------------|--------------|---------------------|----------------------------------------|----------------------------|---------------------------|-----------------------------|-------------------------------------|----------------------------------|---------------------------------------------------------------------------------------------------------------------------------------------------------------|--|--|--|
|                       |                                                      |               |             |                     | Human                 | Animal       | Environment | Prevention        | Mitigation      | Surveillance | Innovation          | Reduce Need and Unintentional Exposure |                            |                           |                             | Optimize Use of Medicines           |                                  |                                                                                                                                                               |  |  |  |
|                       |                                                      |               |             |                     |                       |              |             |                   |                 |              |                     | Human Infection Prevention and Control | Clean Water and Sanitation | Food Safety and Security  | Environmental Contamination | Human Consumption of Antimicrobials | Use of Antimicrobials in Animals | Use of Antimicrobials in Plants                                                                                                                               |  |  |  |
| Eswatini              | AFR: LIC                                             | 2018-22       | 1           |                     | 42                    | 42           | 17          | 32                | 22              | 28           | 17                  | 25                                     | 15                         | 8                         | 11                          | 14                                  | 18                               | 10                                                                                                                                                            |  |  |  |
| Ghana                 | AFR: LIC                                             | 2017-21       | 2           |                     | 33                    | 53           | 13          | 23                | 43              | 18           | 16                  | 20                                     | 3                          | 7                         | 17                          | 16                                  | 19                               | 18                                                                                                                                                            |  |  |  |
| Kenya                 | AFR: LIC                                             | 2017-22       | 1           |                     | 33                    | 40           | 27          | 21                | 43              | 13           | 23                  | 28                                     | 6                          | 15                        | 6                           | 13                                  | 23                               | 9                                                                                                                                                             |  |  |  |
| Liberia               | AFR: LIC                                             | 2018-22       | 1           |                     | 36                    | 45           | 18          | 29                | 30              | 23           | 19                  | 20                                     | 15                         | 13                        | 14                          | 15                                  | 18                               | 6                                                                                                                                                             |  |  |  |
| Nigeria               | AFR: LIC                                             | 2017-22       | 1           |                     | 50                    | 36           | 14          | 24                | 33              | 23           | 20                  | 24                                     | 11                         | 11                        | 21                          | 14                                  | 19                               | 0                                                                                                                                                             |  |  |  |
| Sierra Leone          | AFR: LIC                                             | 2018-22       | 1           |                     | 30                    | 30           | 40          | 14                | 37              | 22           | 27                  | 18                                     | 13                         | 10                        | 15                          | 17                                  | 17                               | 11                                                                                                                                                            |  |  |  |
| South Africa          | AFR: MIC                                             | 2018-24       | 2           |                     | 71                    | 29           | 0           | 14                | 33              | 15           | 38                  | 24                                     | 9                          | 7                         | 0                           | 21                                  | 22                               | 17                                                                                                                                                            |  |  |  |
| Tanzania              | AFR: LIC                                             | 2017-22       | 1           |                     | 33                    | 33           | 33          | 26                | 29              | 24           | 22                  | 22                                     | 5                          | 9                         | 12                          | 16                                  | 20                               | 15                                                                                                                                                            |  |  |  |
| Canada                | AMR: HIC                                             | 2017-         | 1           |                     | 50                    | 38           | 13          | 11                | 22              | 23           | 44                  | 29                                     | 3                          | 11                        | 3                           | 27                                  | 26                               | 1                                                                                                                                                             |  |  |  |
| United States         | AMR: HIC                                             | 2020-25       | 2           |                     | 43                    | 43           | 14          | 13                | 22              | 28           | 38                  | 29                                     | 5                          | 13                        | 8                           | 16                                  | 18                               | 11                                                                                                                                                            |  |  |  |
| Afghanistan           | EMR: LIC                                             | 2017-21       | 1           |                     | 42                    | 42           | 16          | 23                | 38              | 17           | 22                  | 19                                     | 6                          | 17                        | 19                          | 20                                  | 18                               | 0                                                                                                                                                             |  |  |  |
| Iran                  | EMR: MIC                                             | 2016-21       | 1           |                     | 50                    | 38           | 13          | 13                | 47              | 17           | 23                  | 24                                     | 11                         | 17                        | 12                          | 17                                  | 19                               | 0                                                                                                                                                             |  |  |  |
| Iraq                  | EMR: MIC                                             | 2018-22       | 1           |                     | 33                    | 40           | 27          | 23                | 24              | 24           | 29                  | 22                                     | 16                         | 11                        | 8                           | 17                                  | 27                               | 0                                                                                                                                                             |  |  |  |
| Jordan                | EMR: MIC                                             | 2018-22       | 1           |                     | 60                    | 40           | 0           | 27                | 29              | 20           | 23                  | 28                                     | 6                          | 12                        | 0                           | 28                                  | 27                               | 0                                                                                                                                                             |  |  |  |
| Libya                 | EMR: MIC                                             | 2019-23       | 1           |                     | 45                    | 36           | 18          | 32                | 29              | 29           | 9                   | 29                                     | 9                          | 5                         | 1                           | 26                                  | 25                               | 4                                                                                                                                                             |  |  |  |
| Pakistan              | EMR: LIC                                             | 2017-         | 1           |                     | 63                    | 25           | 13          | 21                | 35              | 20           | 24                  | 28                                     | 11                         | 5                         | 5                           | 22                                  | 28                               | 0                                                                                                                                                             |  |  |  |
| Finland               | EUR: HIC                                             | 2017-21       | 1           |                     | 50                    | 40           | 10          | 19                | 30              | 21           | 30                  | 27                                     | 0                          | 16                        | 6                           | 20                                  | 31                               | 0                                                                                                                                                             |  |  |  |
| Sweden                | EUR: HIC                                             | 2020-23       | 2           |                     | 22                    | 11           | 67          | 12                | 15              | 25           | 48                  | 17                                     | 14                         | 11                        | 16                          | 21                                  | 21                               | 0                                                                                                                                                             |  |  |  |
| Tajikistan            | EUR: LIC                                             | 2018-         | 1           |                     | 43                    | 29           | 29          | 29                | 22              | 17           | 31                  | 25                                     | 13                         | 11                        | 11                          | 18                                  | 22                               | 0                                                                                                                                                             |  |  |  |
| India                 | SEAR: LIC                                            | 2017-21       | 2*          |                     | 40                    | 35           | 25          | 21                | 36              | 20           | 23                  | 19                                     | 7                          | 15                        | 22                          | 15                                  | 21                               | 0                                                                                                                                                             |  |  |  |
| Maldives              | SEAR: MIC                                            | 2017-22       | 1           |                     | 45                    | 36           | 18          | 22                | 33              | 27           | 19                  | 18                                     | 10                         | 17                        | 11                          | 22                                  | 22                               | 0                                                                                                                                                             |  |  |  |
| Cambodia              | WPR: LIC                                             | 2019-23       | 2           |                     | 38                    | 38           | 25          | 27                | 27              | 24           | 23                  | 19                                     | 6                          | 20                        | 14                          | 17                                  | 20                               | 3                                                                                                                                                             |  |  |  |
| Micronesia            | WPR: LIC                                             | 2019-23       | 1           |                     | 60                    | 40           | 0           | 23                | 46              | 14           | 18                  | 22                                     | 15                         | 15                        | 0                           | 25                                  | 22                               | 0                                                                                                                                                             |  |  |  |
| Philippine            | WPR: LIC                                             | 2019-23       | 2           |                     | 50                    | 38           | 13          | 26                | 39              | 15           | 19                  | 30                                     | 2                          | 17                        | 7                           | 21                                  | 23                               | 0                                                                                                                                                             |  |  |  |
| Singapore             | WPR: HIC                                             | 2017-         | 1           |                     | 39                    | 33           | 28          | 14                | 36              | 18           | 32                  | 23                                     | 15                         | 18                        | 10                          | 19                                  | 16                               | 0                                                                                                                                                             |  |  |  |
| Score Card            |                                                      |               |             |                     | Water Type            |              |             |                   |                 |              |                     |                                        |                            |                           |                             |                                     |                                  | * This is India's first NAP, but the country established the National Policy on AMR Containment in 2011, which set the stage for the development of their NAP |  |  |  |
|                       |                                                      |               |             |                     | Green Water           |              |             |                   | Blue Water      |              |                     | Brown Water                            |                            |                           |                             |                                     |                                  |                                                                                                                                                               |  |  |  |
| AMR One Health Sector | 0-17%                                                | 18-35%        | 36-53%      | 54-72%              | Surface Water         | Marine Water | Groundwater | Karst Groundwater | Municipal Water | Well Water   | Self-Supplied Water | Agricultural Wastewater                | Industrial Wastewater      | Pharmaceutical Wastewater | Municipal Wastewater        | Hospital Wastewater                 | Stormwater                       |                                                                                                                                                               |  |  |  |
| Pillars               | 0-11%                                                | 12-23%        | 24-35%      | 36-48%              |                       |              |             |                   |                 |              |                     |                                        |                            |                           |                             |                                     |                                  |                                                                                                                                                               |  |  |  |
| Themes                | 0-7%                                                 | 8-15%         | 16-23%      | 24-32%              |                       |              |             |                   |                 |              |                     |                                        |                            |                           |                             |                                     |                                  |                                                                                                                                                               |  |  |  |
