# Supplementary material for: Antimicrobial Resistance and Environmental Health: A Water Stewardship Framework for Global and National Action
Source: MDPI journal article supplement (doi:10.3390/antibiotics11010063), 2022-01-05
Supplement: s1 [file s1]

| Country                                                                                                                                                       | WHO Region<br>& World<br>Bank<br>Country<br>Income<br>Classification | NAP<br>Timeframe<br>(Year) | NAP<br>Version |
|---------------------------------------------------------------------------------------------------------------------------------------------------------------|----------------------------------------------------------------------|----------------------------|----------------|
| Eswatini                                                                                                                                                      | AFR: LIC                                                             | 2018-22                    | 1              |
| Ghana                                                                                                                                                         | AFR: LIC                                                             | 2017-21                    | 2              |
| Kenya                                                                                                                                                         | AFR: LIC                                                             | 2017-22                    | 1              |
| Liberia                                                                                                                                                       | AFR: LIC                                                             | 2018-22                    | 1              |
| Nigeria                                                                                                                                                       | AFR: LIC                                                             | 2017-22                    | 1              |
| Sierra Leone                                                                                                                                                  | AFR: LIC                                                             | 2018-22                    | 1              |
| South Africa                                                                                                                                                  | AFR: MIC                                                             | 2018-24                    | 2              |
| Tanzania                                                                                                                                                      | AFR: LIC                                                             | 2017-22                    | 1              |
| Canada                                                                                                                                                        | AMR: HIC                                                             | 2017- **                   | 1              |
| United States                                                                                                                                                 | AMR: HIC                                                             | 2020-25                    | 2              |
| Afghanistan                                                                                                                                                   | EMR: LIC                                                             | 2017-21                    | 1              |
| Iran                                                                                                                                                          | EMR: MIC                                                             | 2016-21                    | 1              |
| Iraq                                                                                                                                                          | EMR: MIC                                                             | 2018-22                    | 1              |
| Jordan                                                                                                                                                        | EMR: MIC                                                             | 2018-22                    | 1              |
| Libya                                                                                                                                                         | EMR: MIC                                                             | 2019-23                    | 1              |
| Pakistan                                                                                                                                                      | EMR: LIC                                                             | 2017- **                   | 1              |
| Finland                                                                                                                                                       | EUR: HIC                                                             | 2017-21                    | 1              |
| Sweden                                                                                                                                                        | EUR: HIC                                                             | 2020-23                    | 2              |
| Tajikistan                                                                                                                                                    | EUR: LIC                                                             | 2018- **                   | 1              |
| India                                                                                                                                                         | SEAR: LIC                                                            | 2017-21                    | 2*             |
| Maldives                                                                                                                                                      | SEAR: MIC                                                            | 2017-22                    | 1              |
| Cambodia                                                                                                                                                      | WPR: LIC                                                             | 2019-23                    | 2              |
| Micronesia                                                                                                                                                    | WPR: LIC                                                             | 2019-23                    | 1              |
| Philippine                                                                                                                                                    | WPR: LIC                                                             | 2019-23                    | 2              |
| Singapore                                                                                                                                                     | WPR: HIC                                                             | 2017- **                   | 1              |
| * This is India's first NAP, but the country established the National Policy on AMR Containment in 2011, which set the stage for the development of their NAP |                                                                      |                            |                |
| ** No end date was noted for the NAP                                                                                                                          |                                                                      |                            |                |
