# Supplementary material for: Antimicrobial Resistance and Environmental Health: A Water Stewardship Framework for Global and National Action
Source: MDPI journal article supplement (doi:10.3390/antibiotics11010063), 2022-01-05
Supplement: s1 [file s1]

| <b>Response:</b> | <b>Criteria:</b>                                              | <b>Weighted Score:</b> | <b>Scoring Guidelines</b>                                                                                                                                            | <b>Water focus Scoring Guidelines</b> |
|------------------|---------------------------------------------------------------|------------------------|----------------------------------------------------------------------------------------------------------------------------------------------------------------------|---------------------------------------|
| <b>A</b>         | Not included in NAP                                           | 0                      | The sub lever in relation to the designated theme was not mentioned within the NAP                                                                                   | In relation to water focus            |
| <b>B</b>         | Acknowledged, but no plan of action in NAP                    | 0.25                   | The sub lever in relation to the designated theme was mentioned within the NAP but no concrete steps, goals, or plans were outlined                                  | In relation to water focus            |
| <b>C</b>         | Plan of action outlined in NAP                                | 0.5                    | The sub lever in relation to the designated theme was mentioned within the NAP and goals, timeline, future steps, plans were outlined                                | In relation to water focus            |
| <b>D</b>         | Implementation in NAP                                         | 0.75                   | The sub lever in relation to the designated theme was mentioned within the NAP and a plan of action and program was implemented                                      | In relation to water focus            |
| <b>E</b>         | Established active plan of action/ stewardship program in NAP | 1                      | The sub lever in relation to the designated theme was mentioned within the NAP and an established active plan and program are continuously implemented and evaluated | In relation to water focus            |
| <b>NA</b>        | Not applicable                                                |                        |                                                                                                                                                                      |                                       |
