# Supplementary material for: Antimicrobial Resistance and Environmental Health: A Water Stewardship Framework for Global and National Action
Source: Antibiotics (Basel). 2022 Jan 5;11(1):63. doi: 10.3390/antibiotics11010063 (PMC8773023; doi:10.3390/antibiotics11010063)
Supplement: Supplementary file 1 [file antibiotics-11-00063-s001.zip]

Archive with 6 entries (6 files):
- Figure S1_ONeHEalth-OneWater-AMR_StewardshipFrameworkEvaluationResults.pdf
- Figure S2_Linear Regression Results.pdf
- Table S1_NAP-CaseStudy-Parameters.pdf
- Table S2_Framework_Guidelines.pdf
- Table S3_Framework_Scoring_Guidelines.pdf
- Table S4_Sustainable_Development_Goal_Data.xlsx
