# Supplementary material for: Antimicrobial Resistance and Environmental Health: A Water Stewardship Framework for Global and National Action
Source: Antibiotics (Basel). 2022 Jan 5;11(1):63. doi: 10.3390/antibiotics11010063 (PMC8773023; doi:10.3390/antibiotics11010063)
Supplement: Supplementary file 1 [file antibiotics-11-00063-s001.zip › Table S4_Sustainable_Development_Goal_Data.xlsx]

## Sheet: SGD 6
SDG 6	6.1.1 Drinking Water									6.2.1a Sanitation									6.3.1 Wastewater					6.3.2 Water Quality
	Proportion of population using safely managed drinking water service (%) 2005- 2020									Proportion of population using safely managed drinking water service (%) 2005- 2020										Proportion of wastewater safely treated (%) 2020				Proportion of Bodies of Water with Good Ambient Water Quality (%) 2017-2020
	Country	Year	Safely Manage Service	At least basic service	basic service	limited	Unimproved	Surface water		Country	Year	Safely Manage Service	At least basic service	basic service	limited	Unimproved	Open defecation		Coutry	Domestic	Service	Industrial		Coutry	Year	Overall	Rivers	Open Water Bodies
	Eswatini	2020		70.75		9.51	9.84	9.9		Eswatini	2020		64.29		21.63	10.26	3.81		Eswatini	17.91				Eswatini	2020	87.5	87.5
	Ghana	2020	41.41		44.38	6.59	2.81	4.81		Ghana	2020	13.32		10.38	47.44	11.08	17.78		Ghana	12.13				Ghana
	Kenya	2020		61.63		9.54	9.78	19.05		Kenya	2020		32.7		25.47	33.32	8.51		Kenya					Kenya	2020	86.5	90.4	33.3
	Liberia	2020		75.26		8.7	3.49	12.55		Liberia	2020		18.16		29.33	14.82	37.68		Liberia					Liberia	2020	50	33.3	100
	Nigeria	2020	21.67		55.94	4.98	11.8	5.61		Nigeria	2020	30.51		12.21	19.54	19.08	18.66		Nigeria	48.29				Nigeria	2020	12.5	15.1	7.8
	Sierra Leone	2020	10.62		53.15	9.02	15.56	11.65		Sierra Leone	2020	14.05		2.46	37.92	29.18	16.39		Sierra Leone	8.39				Sierra Leone	2020	41.7	41.7
	South Africa	2020		93.89		2.77	1.41	1.93		South Africa	2020		78.47		14.76	6.54	0.22		South Africa	61.29				South Africa	2020	52.1	52.3	43.5
	Tanzania	2020		60.72		11.29	14.52	13.48		Tanzania	2020	26.33		5.43	18.66	38.68	10.89		Tanzania					Tanzania	2020	85.3	87	80
	Canada	2020	99.04		0.18	0	0.78	0		Canada	2020	84.37		14.66	0	0.97	0		Canada	77.06				Canada	2020	82.2	82.2
	United States	2020	97.33		2.56	0	0.12	0		United States	2020	98.26		1.42	0	0.32	0		United States	91.06				United States	2020	33.7	32.6	44.7
	Afghanistan	2020	27.59		47.5	1.45	14.56	8.9		Afghanistan	2020		50.5		10.94	27.77	10.78		Afghanistan					Afghanistan
	Iran	2020	93.98		3.5	1.94	0.51	0.07		Iran	2016-2020		90.27		9.73	0	0.37		Iran	22.07				Iran
	Iraq	2020	59.65		38.7	0.89	0	0.75		Iraq	2020	42.88		57.09	0	0.03	0		Iraq	37.09				Iraq
	Jordan	2020	85.7		13.24	0.15	0.85	0.06		Jordan	2020	82.27		14.81	1.66	1.15	0.11		Jordan	82				Jordan	2017-20	100	66.7	100
	Libya	2020		99.89		0	0.11	0		Libya	2020	21.62		70.49	7.15	0	0.75		Libya	16.63				Libya
	Pakistan	2020	35.84		54.31	3.82	4.41	1.62		Pakistan	2020		68.4		10.53	13.77	7.3		Pakistan					Pakistan
	Finland	2020	99.64		0.36	0	0	0		Finland	2020	84.1		15.35	0.55	0	0		Finland	92.28				Finland	2020	96.8	100	100
	Sweden	2020	99.75		0.08	0	0.17	0		Sweden	2020	94.93		4.36	0.7	0.01	0		Sweden	95.2				Sweden	2020	48.4	34.6	53
	Tajikistan	2020	55.24		26.62	2.57	3.42	12.16		Tajikistan	2020		96.77		2.6	0.63	0		Tajikistan					Tajikistan
	India	2020		90.49		4.98	3.96	0.56		India	2020	45.91		25.36	12.1	1.71	14.93		India	26.56				India
	Maldives	2020		99.54		0.05	0.41	0		Maldives	2020		99.16		0.3	0.55	0		Maldives					Maldives
	Cambodia	2020	27.76		43.46	13.9	5.68	9.2		Cambodia	2020		68.77		8	3.95	19.28		Cambodia					Cambodia
	Micronesia	2014-2019		88.31		0	11.69	7		Micronesia	2014-2019		88.31		0	11.69	9.5		Micronesia					Micronesia
	Philippine	2020	47.46		46.64	2.86	3.03	0		Philippine	2020	60.64		21.62	11.12	2.84	3.79		Philippine	43				Philippine
	Singapore	2020	100		0	0	0	0		Singapore	2020	100		0	0	0	0		Singapore	100				Singapore	2020	100		100
	Source: https://www.sdg6data.org/indicator/6.1.1									Source: https://www.sdg6data.org/indicator/6.2.1a									Source: https://www.sdg6data.org/indicator/6.3.1					Source: https://www.sdg6data.org/indicator/6.3.2
